# Supplementary material for: A new POM–MOF hybrid microporous material with ultrahigh thermal stability and selective adsorption of organic dyes
Source: Royal Society of Chemistry journal article supplement (doi:10.1039/c6ra10422c), 2016-01-01
Supplement: c6ra10422c1.pdf [file c6ra10422c1.pdf]

## Electronic Supplementary Information

### **A New POM-MOF hybrid Microporous Material with Ultrahigh Thermal Stability And Selective Adsorption of Organic Dyes**

**Miao Huo,<sup>a,b</sup> Wenbin Yang,<sup>\*a</sup> Hailong Zhang,<sup>a,b</sup> Lei Zhang,<sup>a</sup> Jianzhen Liao<sup>a,b</sup> Lang Lin<sup>a</sup>,  
and Canzhong Lu<sup>\*a</sup>**

*<sup>a</sup>State Key Laboratory of Structural Chemistry, Fujian Institute of Research on the Structure of Matter, Chinese Academy of Sciences, Fuzhou, Fujian 350002, China. Fax: (+86)-591-83714946; Tel: (+86)-591-83705794; E-mail:*

*czlu@fjirsm.ac.cn.*

*<sup>b</sup>University of Chinese Academy of Sciences, Beijing, 100049, China.*

#### **Dye adsorption selective kinetic experiments**

Crystalline sample of compound **1** (50mg) was added into the aqueous solution (10 mg L<sup>-1</sup>, 100 mL) of methylene blue(MB<sup>+</sup>), methyl orange (MO<sup>-</sup>) and rhodamine 6G (R6G<sup>+</sup>), respectively, at room temperature under stirring. At given time intervals, the change of the concentration of dye solutions were monitored using UV-Vis spectra at the characteristic absorption peak of each dye (664nm, 464nm, 527nm, for MB<sup>+</sup>, MO<sup>-</sup>, R6G<sup>+</sup>, respectively). The results are shown in Fig.4 in text. Similarly, crystalline sample (100 mg) of **1** was added into 100 mL a binary mixture of MB<sup>+</sup>/MO<sup>-</sup>, MB<sup>+</sup>/R6G<sup>+</sup> or MB<sup>+</sup>/RhB<sup>+</sup> at room temperature under stirring. The starting concentration of each dye component in the binary mixture is 10 mg L<sup>-1</sup>. At given time intervals, the change of the concentration of each dye component was monitored by UV-Vis spectra. The results are shown in Fig. 5 in text.

#### **Photodegradation experiments of MO<sup>-</sup>**

Crystalline sample (50 mg) of **1** was dispensed into a solution (10.0 mg L<sup>-1</sup>, 100 mL) of MO<sup>-</sup> under stirring. After adding 2.0 mL hydrogen peroxide (30%), the reaction mixture was irradiated with 300W Xe lamp as the visible light source. At given time intervals, the concentration of dyes was measured with UV-Vis spectra at the maximum absorbance of the MO<sup>-</sup> dye. In comparison, blank experiments were also carried out: (1) without catalyst **1** but in the presence of peroxide (2.0 mL); (2) without light irradiation but in the presence of catalyst **1** and peroxide (2.0 mL). The results are shown in Fig. 6 in text.

**Table S1.** Selected Bond Lengths (Å) for Compound 1.

|                                                                                                                                              |          |             |          |              |          |
|----------------------------------------------------------------------------------------------------------------------------------------------|----------|-------------|----------|--------------|----------|
| W(1)-O(5)                                                                                                                                    | 1.695(6) | W(2)-O(2)   | 1.919(6) | P(1)-O(7)    | 1.556(5) |
| W(1)-O(3)#1                                                                                                                                  | 1.897(6) | W(2)-O(4)   | 1.936(6) | P(1)-O(7)#1  | 1.556(5) |
| W(1)-O(6)                                                                                                                                    | 1.898(6) | W(2)-O(7)   | 1.427(5) | P(1)-O(7)#3  | 1.556(5) |
| W(1)-O(4)                                                                                                                                    | 1.916(6) | W(3)-O(9)   | 1.694(6) | P(1)-O(7)#2  | 1.557(5) |
| W(1)-O(10)#2                                                                                                                                 | 1.931(6) | W(3)-O(6)#2 | 1.894(6) | Cu(1)-N(1)#4 | 1.999(7) |
| W(1)-O(7)                                                                                                                                    | 2.437(5) | W(3)-O(8)   | 1.901(6) | Cu(1)-N(1)#2 | 1.999(7) |
| W(2)-O(1)                                                                                                                                    | 1.689(6) | W(3)-O(2)#1 | 1.919(6) | Cu(1)-N(2)#5 | 2.033(7) |
| W(2)-O(8)                                                                                                                                    | 1.896(6) | W(3)-O(10)  | 1.916(6) | Cu(1)-N(2)   | 2.033(7) |
| W(2)-O(3)                                                                                                                                    | 1.895(6) | W(3)-O(7)#1 | 2.429(5) |              |          |
| Symmetry codes: #1 -y+3/4,x-1/4,-z+5/4; #2 y+1/4,-x+3/4,-z+5/4; #3 -x+1,-y+1/2,z; #4 -y+5/4,-x+3/4,z-1/4; #5 -x+3/2,y,-z+1 #6 -x+1,-y+1,-z+1 |          |             |          |              |          |

**Table S2.** Selected Bond Angles (°) for Compound 1.

|                                                                                                                                              |          |                    |          |                     |          |
|----------------------------------------------------------------------------------------------------------------------------------------------|----------|--------------------|----------|---------------------|----------|
| O(5)-W(1)-O(3)#1                                                                                                                             | 104.0(3) | O(8)-W(2)-O(2)     | 155.5(3) | O(8)-W(3)-O(10)     | 155.6(3) |
| O(5)-W(1)-O(6)                                                                                                                               | 103.2(3) | O(3)-W(2)-O(2)     | 89.0(3)  | O(2)#1-W(3)-O(10)   | 86.4(3)  |
| O(3)#1-W(1)-O(6)                                                                                                                             | 85.5(3)  | O(1)-W(2)-O(4)     | 100.9(3) | O(9)-W(3)-O(7)#1    | 169.2(3) |
| O(5)-W(1)-O(4)                                                                                                                               | 101.3(3) | O(8)-W(2)-O(4)     | 88.5(3)  | O(6)#2-W(3)-O(7)#1  | 84.2(2)  |
| O(3)#1-W(1)-O(4)                                                                                                                             | 88.6(3)  | O(3)-W(2)-O(4)     | 155.8(3) | O(8)-W(3)-O(7)#1    | 84.2(2)  |
| O(6)-W(1)-O(4)                                                                                                                               | 155.5(3) | O(2)-W(2)-O(4)     | 86.2(3)  | O(2)#1-W(3)-O(7)#1  | 70.8(2)  |
| O(5)-W(1)-O(10)#2                                                                                                                            | 100.8(3) | O(1)-W(2)-O(7)     | 168.5(3) | O(10)-W(3)-O(7)#1   | 71.5(2)  |
| O(3)#1-W(1)-O(10)#2                                                                                                                          | 155.2(3) | O(8)-W(2)-O(7)     | 84.8(2)  | O(7)-P(1)-O(7)#1    | 109.5(2) |
| O(6)-W(1)-O(10)#2                                                                                                                            | 88.5(3)  | O(3)-W(2)-O(7)     | 84.6(2)  | O(7)-P(1)-O(7)#3    | 109.3(4) |
| O(4)-W(1)-O(10)#2                                                                                                                            | 87.0(3)  | O(2)-W(2)-O(7)     | 70.9(2)  | O(7)#1-P(1)-O(7)#3  | 109.5(2) |
| O(5)-W(1)-O(7)                                                                                                                               | 169.1(3) | O(4)-W(2)-O(7)     | 71.5(2)  | O(7)-P(1)-O(7)#2    | 109.5(2) |
| O(3)#1-W(1)-O(7)                                                                                                                             | 84.4(2)  | O(9)-W(3)-O(6)#2   | 103.3(3) | O(7)#1-P(1)-O(7)#2  | 109.3(4) |
| O(6)-W(1)-O(7)                                                                                                                               | 84.2(2)  | O(9)-W(3)-O(8)     | 103.6(3) | O(7)#3-P(1)-O(7)#2  | 109.5(2) |
| O(4)-W(1)-O(7)                                                                                                                               | 71.8(2)  | O(6)#2-W(3)-O(8)   | 85.7(2)  | N(1)#4-Cu(1)-N(1)#2 | 115.9(4) |
| O(10)#2-W(1)-O(7)                                                                                                                            | 71.5(2)  | O(9)-W(3)-O(2)#1   | 101.6(3) | N(1)#4-Cu(1)-N(2)#5 | 110.8(2) |
| O(1)-W(2)-O(8)                                                                                                                               | 103.3(3) | O(6)#2-W(3)-O(2)#1 | 155.0(3) | N(1)#2-Cu(1)-N(2)#5 | 106.7(2) |
| O(1)-W(2)-O(3)                                                                                                                               | 103.9(3) | O(8)-W(3)-O(2)#1   | 88.6(3)  | N(1)#4-Cu(1)-N(2)   | 106.7(2) |
| O(8)-W(2)-O(3)                                                                                                                               | 86.0(3)  | O(9)-W(3)-O(10)    | 100.8(3) | N(1)#2-Cu(1)-N(2)   | 111.0(2) |
| O(1)-W(2)-O(2)                                                                                                                               | 100.6(3) | O(6)#2-W(3)-O(10)  | 88.7(3)  | N(2)#5-Cu(1)-N(2)   | 105.3(4) |
| Symmetry codes: #1 -y+3/4,x-1/4,-z+5/4; #2 y+1/4,-x+3/4,-z+5/4; #3 -x+1,-y+1/2,z; #4 -y+5/4,-x+3/4,z-1/4; #5 -x+3/2,y,-z+1 #6 -x+1,-y+1,-z+1 |          |                    |          |                     |          |

**Table S3.** Molecular Dimensions of Dye Molecules with Different Charges used here.

|       | MB <sup>+</sup>                                                                   | MO <sup>-</sup>                                                                   | R6G <sup>+</sup>                                                                    |
|-------|-----------------------------------------------------------------------------------|-----------------------------------------------------------------------------------|-------------------------------------------------------------------------------------|
|       | 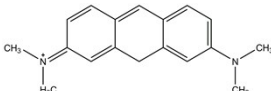 |  |  |
| x (Å) | 4.59                                                                              | 5.31                                                                              | 10.89                                                                               |
| y (Å) | 8.01                                                                              | 7.25                                                                              | 15.72                                                                               |
| z (Å) | 16.75                                                                             | 17.39                                                                             | 15.79                                                                               |

References:

Y.-C. He, J. Yang, W.-Q. Kan, H.-M. Zhang, Y.-Y. Liu and J.-F. Ma, *J. Mater. Chem. A*, 2015, **3**, 1675-1681.

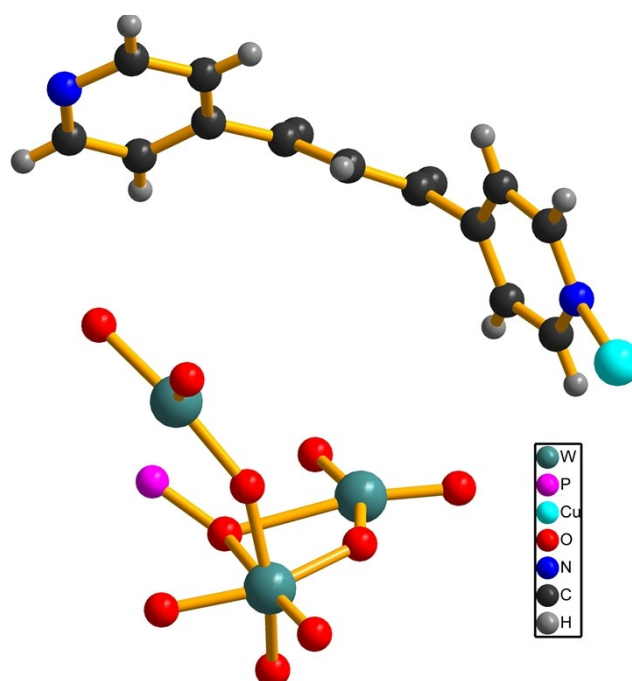

**Fig. S1** The asymmetric unit of Compounds 1.

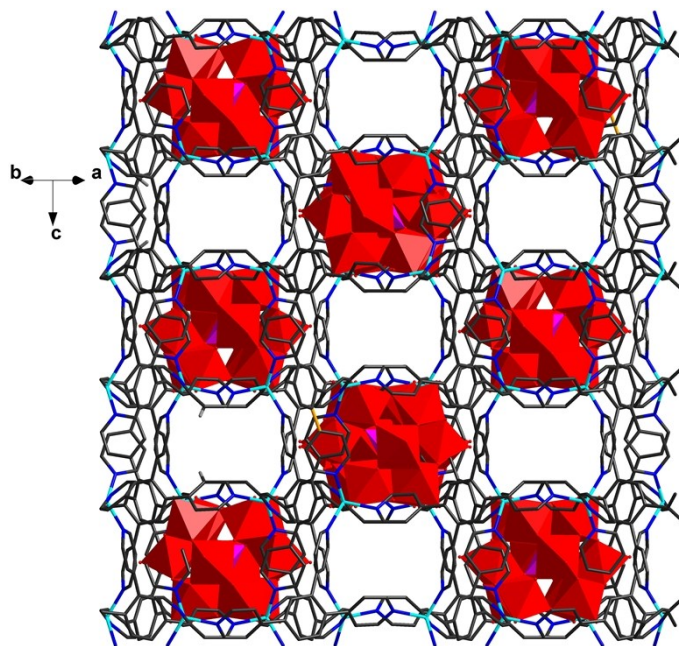

**Fig. S2** A view of the 1D channels along the [110] direction, which are available for accommodate solvent molecules and dimethylamine cations. Keggin anions are highlighted in polyhedral.

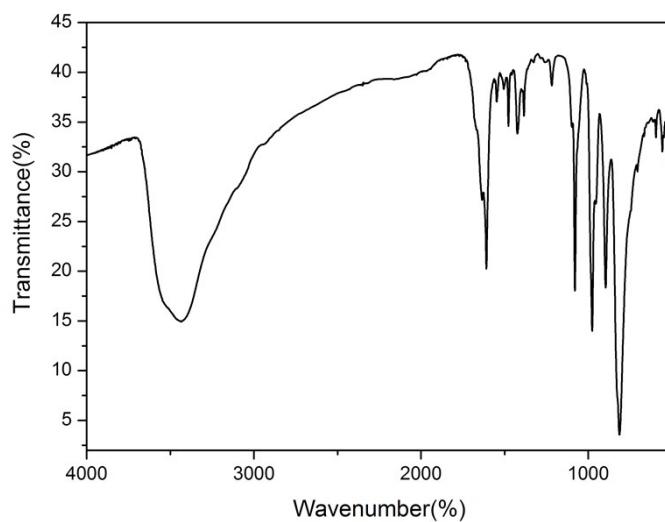

**Fig. S3** The IR spectrum of Compound 1. Main peaks ( $\text{cm}^{-1}$ ): 3440(s), 1610(s), 1544(w), 1479(w), 1421(m), 1382(w), 1218(w), 1076(s), 978(s), 893 (s), 815(s), 594(w), 554(w).

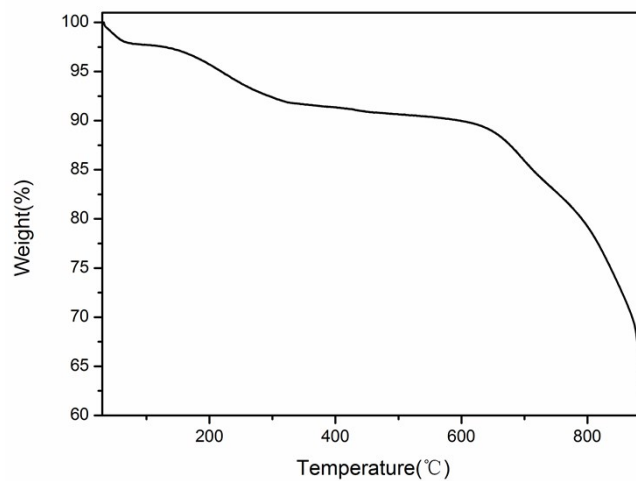

**Fig. S4** The TGA curve of Compounds **1**.

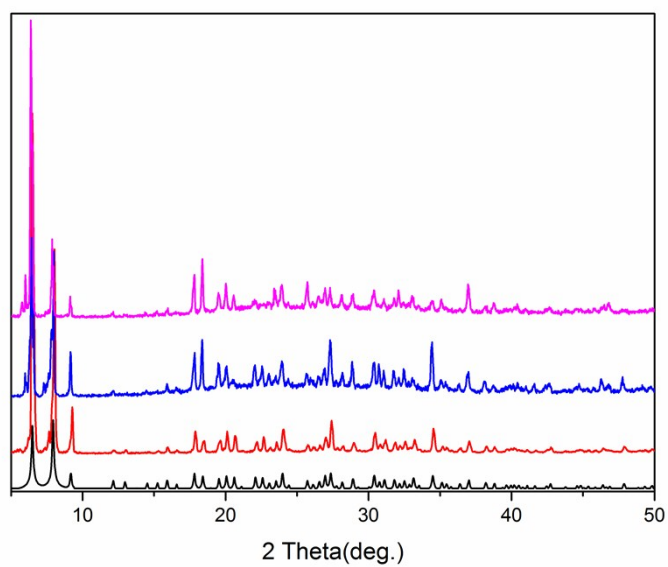

**Fig.S5** PXRD Patterns of **1** (black, simulated; red, as-synthesized; blue, after N<sub>2</sub> absorption; magenta, after MO<sup>-</sup> degradation).

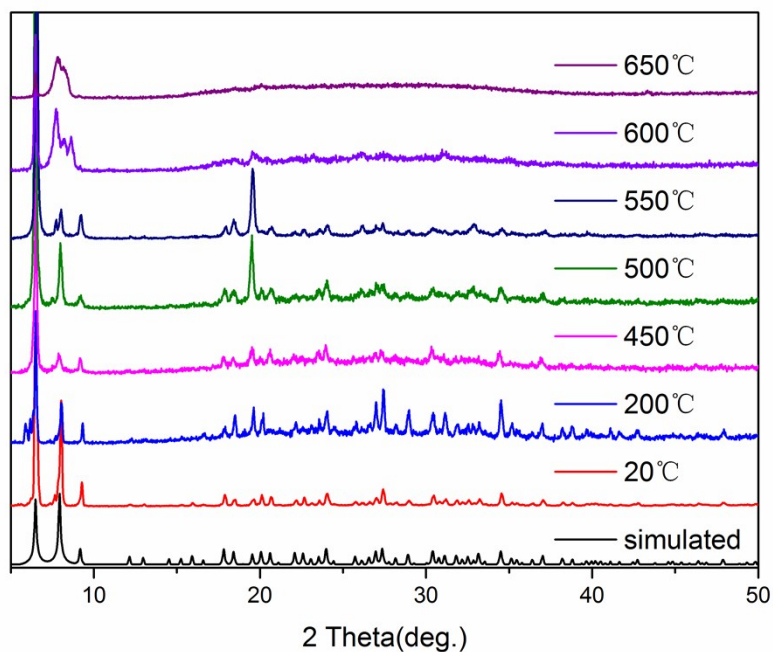

Fig.S6 PXRD patterns of **1** in different temperatures

### N<sub>2</sub> Sorption Experiment for **1**

A Micromeritics (Accelerated Surface Area and Porosimetry) 2020 System was used to measure gas adsorption. Crystalline sample of **1** (200mg) was immersed in methanol for three days at room temperature. The solvent was replaced by fresh methanol every five hours. Crystalline sample of **1** was then degassed under dynamic vacuum at 100 °C for 10 hours to obtain the completely activated samples. The N<sub>2</sub> gas adsorption isotherms was measured at 77 K. Upon loading of MB in **1**, the deep blue powder solid obtained by filtration and washing with water was dried in open air for several days and then degassed under dynamic vacuum at 100 °C for overnight to obtain the completely activated samples. The N<sub>2</sub> gas adsorption isotherms of **1** after the treatment with MB<sup>+</sup> was measured at 77 K.

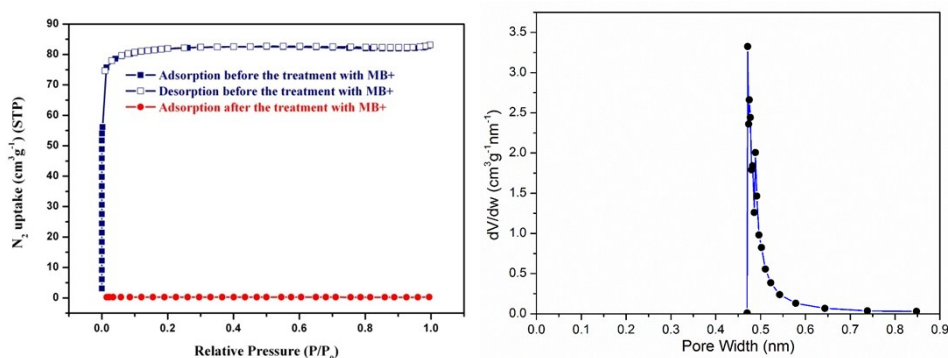

Fig. S7 a) N<sub>2</sub> adsorption isotherms at 77K before and after the treatment with MB<sup>+</sup>, b) Horvath-Kawazoe Differential Pore Volume Plot for **1** before the treatment with MB<sup>+</sup>.

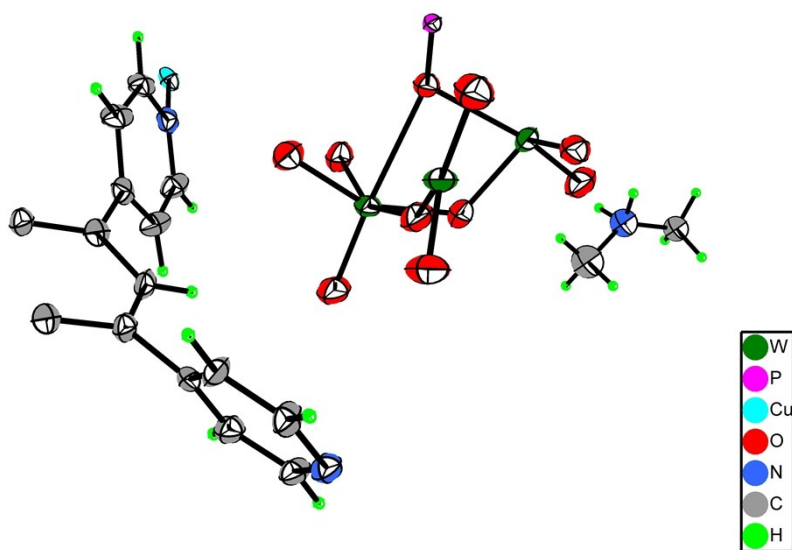

Fig. S8 Ellipsoid plot of the asymmetric unit of compound **1**

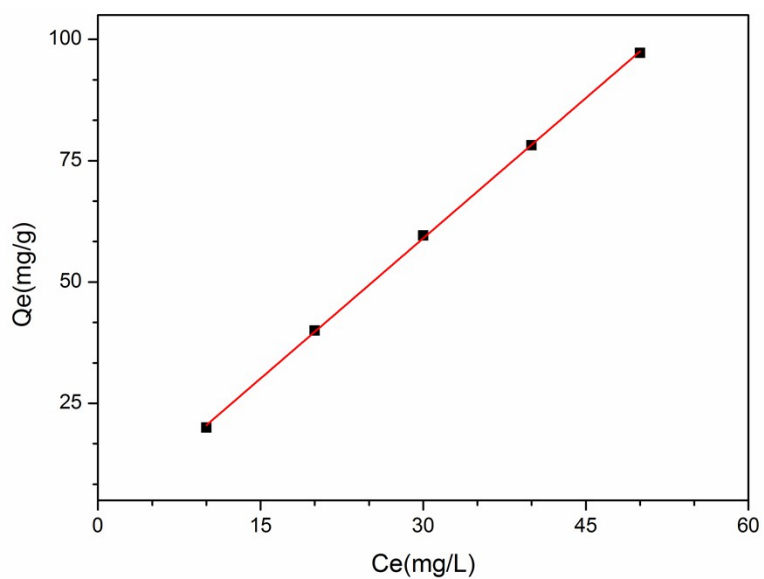

Fig. S9 MB<sup>+</sup> adsorption isotherm at room temperature for **1**.

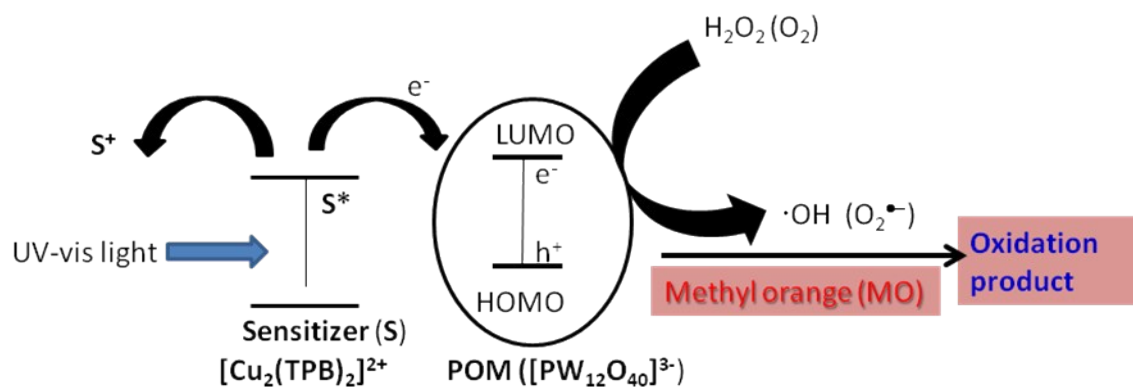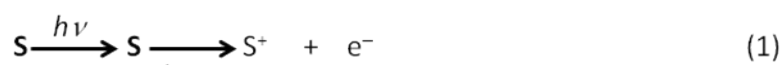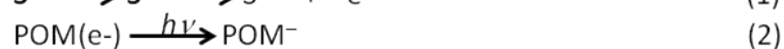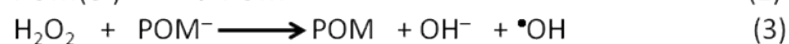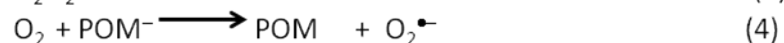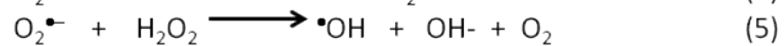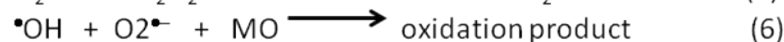

**Scheme S1.** Photo-catalytic degradation mechanism of MO on **1** under UV-vis light irradiation.
